# Supplementary material
Source: Springer Nature journal article supplement (https://www.springermedizin.de/resource/supplementary/13046_2010_400_MOESM5_ESM.pdf/9661942)

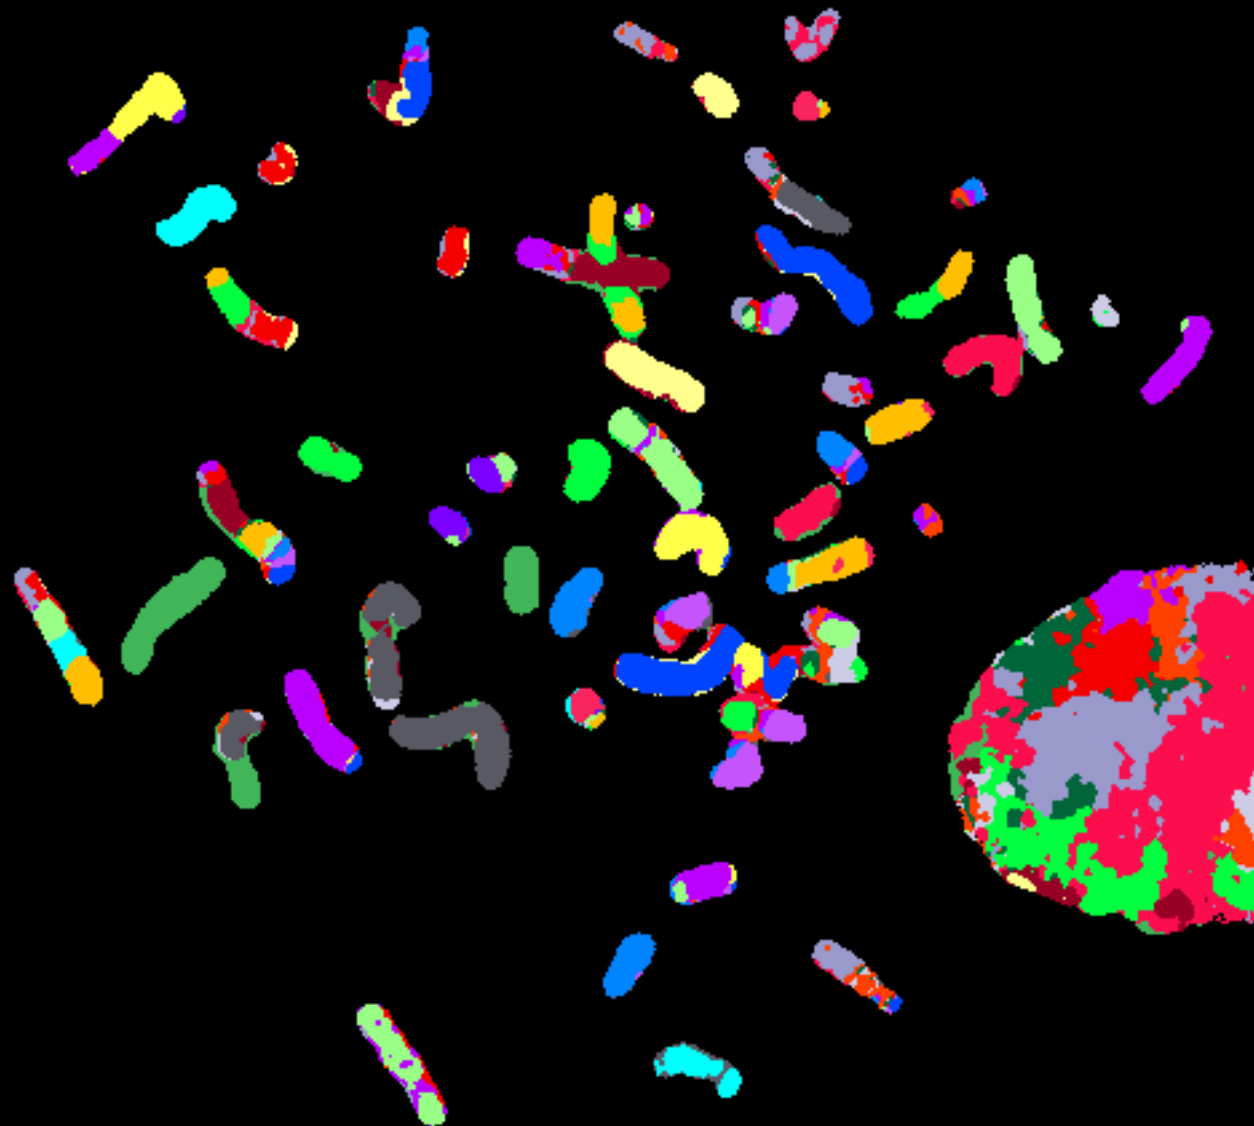

Supplement: MOESM5 [file 9661942]
